# Supplementary material for: Identification of Proanthocyanidins from Litchi (Litchi chinensis Sonn.) Pulp by LC-ESI-Q-TOF-MS and Their Antioxidant Activity
Source: PubMed Central journal article supplement (PMC4368102; doi:10.1371/journal.pone.0120480), 2015-03-20
Supplement: pone.0120480.s001.pdf [file pone.0120480.s001.pdf]

**Table S1.** Harvest places and time of 32 litchi cultivars.

| No. | Cultivar         | Harvest place        | Harvest time | No. | Cultivar          | Location             | Harvest time |
|-----|------------------|----------------------|--------------|-----|-------------------|----------------------|--------------|
| 1   | Baila            | Maoming, Guangdong   | 2011. 6. 16  | 17  | Jinganghongnuo    | Conghua, Guangdong   | 2011. 7. 18  |
| 2   | Baitangying      | Haikou, Hainan       | 2011. 5. 30  | 18  | Jizuili           | Lianjiang, Guangdong | 2011. 7. 08  |
| 3   | Caomeili         | Qinzhou, Guangxi     | 2011. 7. 14  | 19  | Lanzhu            | Zhangzhou, Fujian    | 2011. 7. 18  |
| 4   | Chenzi           | Putian, Fujian       | 2011. 7. 31  | 20  | Lingfengnuo       | Dongguan, Guangdong  | 2011. 7. 08  |
| 5   | Dadingxiang      | Haikou, Hainan       | 2011. 6. 27  | 21  | Miaozhongnuo      | Guangzhou, Guangdong | 2011. 7. 06  |
| 6   | Dazao            | Maoming, Guangdong   | 2011. 6. 22  | 22  | Mili              | Qinzhou, Guangxi     | 2011. 7. 08  |
| 7   | Feizixiao        | Hailou, Hainan       | 2011. 5. 30  | 23  | Nuomici           | Guangzhou, Guangdong | 2011. 7. 06  |
| 8   | Guifeihong       | Qinzhou, Guangxi     | 2011. 7. 20  | 24  | Qinzhouhongli     | Qinzhou, Guangxi     | 2011. 6. 30  |
| 9   | Guiwei           | Dongguan, Guangdong  | 2011. 7. 08  | 25  | Sanyuehong        | Qinzhou, Guangxi     | 2011. 6. 08  |
| 10  | Hemaoli          | Yuanyang, Yunnan     | 2011. 6. 01  | 26  | Shuangjianyuhebao | Yangxi, Guangdong    | 2011. 7. 14  |
| 11  | Heiye            | Maoming, Guangdong   | 2011. 6. 16  | 27  | Shuidong          | Guangzhou, Guangdong | 2011. 6. 08  |
| 12  | Hexiachuan       | Maoming, Guangdong   | 2011. 6. 22  | 28  | Wuheli            | Haikou, Hainan       | 2011. 6. 27  |
| 13  | Huaizhi          | Guangzhou, Guangdong | 2011. 7. 06  | 29  | Xianpoguo         | Guangzhou, Guangdong | 2011. 7. 06  |
| 14  | Hongxiuqiu       | Dongguan, Guangdong  | 2011. 7. 08  | 30  | Yingshanhong      | Qinzhou, Guangxi     | 2011. 7. 20  |
| 15  | Jianjianghongnuo | Maoming, Guangdong   | 2011. 7. 08  | 31  | Yuanhong          | Ningde, Fujian       | 2011. 7. 31  |
| 16  | Jinfeng          | Maoming, Guangdong   | 2011. 6. 30  | 32  | Ziniangxi         | Haikou, Hainan       | 2011. 6. 27  |
